# Supplementary material for: Towards Systematic Discovery of Signaling Networks in Budding Yeast Filamentous Growth Stress Response Using Interventional Phosphorylation Data
Source: PLoS Comput Biol. 2013 Jun 27;9(6):e1003077. doi: 10.1371/journal.pcbi.1003077 (PMC3694812; doi:10.1371/journal.pcbi.1003077)
Supplement: Dataset S1 — The top 8 tight clusters. (XLSX) [file pcbi.1003077.s001.xlsx]

## Sheet: tclust_dataimpute_8_15
Protein & Peptide	LogRatio.SKS1-KD	LogRatio.STE20-KD	LogRatio.SNF1-KD	LogRatio.TPK2-KD	LogRatio.ELM1-KD	LogRatio.FUS3-KD	LogRatio.KSS1-KD	LogRatio.KSP1-KD	Cluster
YRO2 _KAQEEEEDVAT(ph)DS(ph)E_	1.86778	1.83588	1.45502	1.75608	-0.0872433	0.43224	0.0316775	-0.403485	1
BUG1 _SENNDQNDVDEES(ph)EEKEIEQVK_	0.751806	0.958286	0.693409	0.868687	0.368824	0.202324	0.0893626	0.331591	1
VPS74 _ADSGDTSS(ph)IHSSANNTK_	0.453122	0.541217	0.40719	0.261832	0.105117	-0.0381966	0.124978	-0.35838	1
HXK1 _TKYDVAVDEQS(ph)PRPGQQAFEK_	1.45838	2.89198	0.628155	1.68329	0.597031	-0.353358	-0.614006	-0.130231	1
PIL1 _ALLELLDDSPVT(ph)PGETRPAYDGYEASK_	2.00209	3.05316	1.69439	2.63085	-0.0594345	-0.257554	-0.897355	-0.892446	1
FBP26 _LHQLLNDS(ph)PLEDKF_	1.53376	1.63529	0.488716	1.0079	-0.330901	-0.0559137	-1.13968	-0.234568	1
PTK2 _KRPT(ph)SPSISGSGSGGNSPSSSAGAR_	0.887681	0.804549	0.907891	0.668664	-0.136188	0.000576963	-0.283637	-0.495573	1
NPA3 _TKGEVNENS(ph)APDLQR_	1.22138	0.861003	0.668321	0.282065	-0.720398	-0.447151	-0.81802	-0.808311	1
BIR1 _DSTVRQS(ph)PDILHSNK_	0.465086	0.468323	0.145351	0.0406821	-0.479816	-0.27807	-0.614292	-0.757602	1
MYO3 _RGS(ph)VYHVPLNPVQATAVR_	-0.210797	0.634779	0.143393	0.122275	-0.54081	-0.525756	-0.571684	-0.599646	1
UTP14 _TAQSNGNDDEDAS(ph)PQLK_	-0.133907	0.134024	-0.0356679	-0.387544	-0.58554	-0.486327	-0.621777	-0.50034	1
ARE2 _KSS(ph)PDAVDSVGK_	1.58443	1.96314	0.812211	1.67911	-0.0809117	0.458592	-0.012912	-0.257114	1
DBP5 _LADIQADPNS(ph)PLYSAK_	0.436695	1.83843	0.877681	1.21806	-1.28999	-1.22818	-1.9443	-1.81222	1
RUD3 _MSTDPEADGIVAS(ph)PDDEGKDLSEGVDKQK_	0.821873	1.60184	1.01328	1.14097	-0.0440177	-0.496102	-0.233768	-0.20135	1
VMA2 _ARDDADEDEEDPDTRSS(ph)GK_	0.0289934	0.125519	-0.0747601	0.0684645	0.348508	-0.0587477	0.124978	0.861082	2
SEC31 _VPS(ph)LVATSES(ph)PR_	-0.347876	0.482332	-0.100974	0.292527	1.11191	-0.325575	1.32625	1.37657	2
GLY1 _S(ph)ESTEVDVDGNAIR_	-0.596885	-0.965559	-0.785229	-1.68859	0.957506	0.572162	1.78513	2.11703	2
GLY1 _SEST(ph)EVDVDGNAIR_	-1.33312	0.19333	-1.11127	-0.984374	0.248686	0.198756	1.63872	1.909	2
PEA2 _NT(ph)SSPPIS(ph)PNAAAIQEEDSSK_	-0.3261	-0.584306	-0.492322	-0.294208	0.326184	-0.0204888	0.480496	0.728081	2
VTC2 _LM(ox)GVDS(ph)EEEEIELPPGVK_	0.0219701	0.0911442	-0.262971	-0.287977	0.135272	-0.0365481	0.124978	0.63292	2
KEM1 _KGEIKPSSGTNSTECQS(ph)PK_	-0.352897	-0.399435	-0.472409	-0.293315	0.944334	0.0834517	1.52747	1.90885	2
UFD1 _APKS(ph)PEVIEID_	-0.201261	-0.235076	-0.244916	0.056639	0.771928	0.216238	0.714399	1.74203	2
TIF4631 _APPPKEEPAAPTSTATNM(ox)FSALM(ox)GES(ph)DDEE_	-0.576734	-0.670061	-0.31874	-0.534078	0.45619	0.149196	1.27965	1.4177	2
BCY1 _EKT(ph)S(ph)TPPLPMHFNAQR_	-0.154511	-0.425412	-0.893893	-0.79799	-0.0512048	-0.0380359	0.67382	0.801708	2
BCY1 _EKT(ph)ST(ph)PPLPMHFNAQR_	0.0759684	-0.229216	-0.953132	-0.927085	0.160275	0.284455	1.35744	1.26837	2
SPA2 _KPASFLNDVEEEES(ph)PVKPLK_	-0.140261	0.0739573	-0.538786	0.0566598	0.937269	0.520598	1.20508	1.40376	2
MFT1 _DGLLNEAEGDNIDEDY(ph)ESDEDEERKER_	-0.717928	0.166844	-0.272004	-0.202874	0.139928	0.0206409	0.124978	0.63292	2
NEW1 _GTPKPVDT(ph)DDEED_	-0.225784	-0.319271	-0.274337	-0.342689	-0.145645	-0.00510172	-0.0909566	0.214063	2
KRE6 _AIAS(ph)S(ph)PSLNSNLSK_	-0.240946	-0.582145	-1.56484	-0.936552	0.120194	-0.161912	0.124978	1.71163	2
NUP60 _ISSMPGGYFHSEIS(ph)PDSTVNR_	-1.01922	-1.81408	-0.186672	-2.46849	1.69713	-0.0810643	0.124978	0.21181	3
SLA1 _NFTKS(ph)PSR_	-0.402207	-0.36074	-0.0699803	-0.36133	0.504417	0.359915	0.124978	0.21181	3
STU1 _KSEGDEES(ph)DDAVDENDVKK_	-0.284912	-0.534926	-0.00387161	-0.583982	0.224287	-0.349952	-0.199873	0.00975522	3
YCL020W _VNNDHINESTVSSQYLS(ph)DDNELSLRPATERI_	-2.86565	-3.15663	-1.75273	-1.59283	0.725349	-0.487035	-0.248751	-0.207821	3
VBA4 _IDDSPQDEVNS(ph)IK_	-1.1857	-1.66073	-0.574605	-1.47205	-0.254014	-0.674142	-0.568217	-0.12191	3
HOM2 _NRDS(ph)GYGVSVGR_	-0.710708	-1.04381	-0.257356	-0.934207	0.0207689	-0.0174755	0.124978	-0.368905	3
YDR365W-B _TVPQIS(ph)DQETEKR_	-0.142529	-0.886646	-0.488926	0.0143777	1.34159	0.649386	0.71249	0.758303	3
VPS74 _ADS(ph)GDTSSIHSSANNTK_	-0.951122	-2.03971	0.132906	-1.74362	1.62492	0.000966282	0.0806577	-0.0283516	3
PSP1 _KGS(ph)FTTELSCR_	-0.746519	-0.70875	0.125122	-0.487136	0.757096	0.406976	0.17197	0.702431	3
PSP1 _RSS(ph)YISDTLINHQMPDAR_	-0.537533	-0.582463	-0.0898353	-0.443575	0.104967	0.688628	0.0893239	0.137555	3
CHD1 _AAAHQQNYFNDS(ph)DDEDDEDNIK_	-0.613505	-0.735367	-0.450282	-0.664105	0.306132	0.0103741	-0.331191	0.20936	3
NUP145 _TDGTFGTLSGKDDS(ph)IVEEK_	0.0909889	-0.271966	0.243547	-0.446305	1.5035	0.14672	0.436695	0.733875	3
SPT6 _VGDEGNAAES(ph)ESDNVAASR_	-0.150017	-0.276066	-0.138878	-0.60038	0.615887	0.0732924	0.175045	0.212507	3
HSE1 _HNMSTQADNS(ph)DDEELQK_	-0.537533	-0.582463	-0.026161	-0.416038	0.758218	0.0540844	0.161529	0.479531	3
ABF1 _ADDEEDLS(ph)DENIQPELR_	-0.469829	-0.501075	-0.430383	-0.571643	0.0156403	-0.247937	-0.263785	-0.137299	3
MEH1 _TNTFTLLTS(ph)PDSAK_	-0.537717	-1.61198	-0.981736	-1.1564	0.490966	0.26929	-0.155823	-0.348152	3
CKI1 _TISIESDVSNIT(ph)DDDDLR_	-0.226889	-0.463894	-0.340459	-0.728646	0.857264	0.183842	0.126357	0.40372	3
YLR413W _IIEEHES(ph)PIDAEK_	-3.99572	-3.60196	-3.62078	-2.7669	0.410166	-0.191033	-1.17669	-0.215485	3
SPT5 _DENT(ph)SDKDTVDSGNVTTTESTER_	-0.537533	-0.582463	0.00604663	-0.438444	0.431593	0.371356	0.105276	0.539928	3
HRB1 _RMS(ph)DDHGYER_	-0.215632	-0.209216	0.0736832	-0.145733	0.365637	0.112834	0.052555	0.200903	3
LCB4 _GCLTFEPNPS(ph)PNSS(ph)PDLLSK_	-0.700978	-0.695664	-0.576004	-0.560309	1.27834	0.418999	0.124978	1.07396	3
CAF20 _DIVADKPILGFNAFAALES(ph)EDEDDEA_	-0.716861	-0.887206	-0.510416	-0.754456	0.0989937	0.0807444	-0.495229	0.111668	3
MRL1 _NDDELHDIS(ph)PSLNEQPHWDLIEDGSR_	-0.498082	-0.581543	0.055751	-0.644758	0.562914	0.425889	-0.0834469	0.515107	3
FAP7 _M(ox)WLEQHPDGVTNEYQGPRS(ph)DDEDDEDS(ph)E_	0.193751	0.243225	-0.0243551	0.0377336	0.536053	0.0365385	0.484499	0.523981	4
ITR1 _TSQSNVGDAVGNADS(ph)VEFNSEHDSPSKR_	-1.4405	-1.0221	-3.35308	-4.07213	0.987397	0.173787	0.124978	1.16137	4
LSB3 _GSFDDDEDDYYDDDDYYNDIPS(ph)SFSSTDASSTRPNTR_	-0.814108	-0.112833	-1.46176	-0.556669	0.404722	-0.147724	0.342669	0.349931	4
LEU1 _DQDQSSPKVEVTS(ph)EDEK_	-2.49655	-1.84606	-1.90077	-2.90877	-0.666423	-1.61023	-0.9683	-0.429593	4
LEU1 _VEVT(ph)SEDEKELESAAYDHAEPVQPEDAPQDIANDELK_	-1.55176	-0.980727	-2.20586	-2.64819	-0.757574	-1.4204	-1.10067	-0.0658987	4
FLC3 _NENAS(ph)TDALRVEAPK_	-0.574927	-1.02175	-1.47165	-1.37389	0.0482362	0.0961944	-0.216788	-0.0129476	4
SPT6 _TADKGGILDELDDFIEDDEFS(ph)DEDDETR_	-0.345668	-0.391224	-0.405375	-0.787767	0.18123	-0.052259	-0.331191	0.20936	4
YGR125W _TIEENIDEEYS(ph)DEYSR_	-0.0975548	-0.206716	-0.452096	-0.90977	0.37362	0.262072	0.767401	0.470058	4
CRP1 _RES(ph)TEGVLDGSK_	-0.222178	-1.06293	-1.27984	-0.439715	0.371023	0.0623857	-0.113832	0.713476	4
KEL1 _NNS(ph)PILETLPSNEIK_	0.0659858	0.120352	-0.396802	-0.236299	0.570949	0.241291	0.394624	0.96857	4
LCB3 _TLS(ph)NPNDFQEPNYLLDPGNHPSDHFR_	-0.201394	-0.751538	-0.853944	-1.01447	0.236792	0.257812	0.124978	1.23497	4
YBT1 _ANS(ph)SANLAAK_	-0.60304	-0.613973	-1.89314	-0.47702	0.434977	0.117398	0.811159	0.976336	4
BDF1 _DASSLS(ph)PTSAGSR_	-0.617609	-0.719946	-0.782223	-1.09888	0.268627	0.337009	0.124978	1.07396	4
YMR031C _EATETSS(ph)AVQTKEPEEK_	-0.155405	-1.4202	-1.31126	-1.2032	-0.427501	-0.00921325	-0.294772	-0.444171	4
DDR48 _KSSYGSNNDDSYGS(ph)NNDDSYGSSNK_	-0.307542	-0.837941	-0.692012	-1.01721	-0.0247734	0.573423	0.0220482	0.227011	4
YMR295C _SSISNTS(ph)DHDGANR_	-0.567853	-0.881069	-1.12869	-1.08669	1.12621	0.246408	0.561913	0.714503	4
GPD2 _SDS(ph)AVS(ph)IVHLK_	-0.352036	-0.430879	-2.14918	-1.42989	1.70341	-0.86436	1.30295	1.43893	4
ZEO1 _EQAEAS(ph)IDNLK_	-0.292334	-0.871495	-1.30383	-0.92366	1.38689	-0.591527	1.27965	1.74192	4
ZEO1 _LEETKES(ph)LQNK_	-0.706559	-0.775836	-1.13898	-1.31804	1.8293	-0.765388	1.27965	1.11597	4
CAF20 _KKGSGEDDEEETETT(ph)PTSTVPVATIAQETLK_	0.505535	0.526899	0.435469	0.289144	1.05485	0.771463	1.09065	1.14104	4
SNF2 _NAPLDSKDENFASVS(ph)PAGPSSVHNAK_	-0.0650684	-0.520604	-0.740023	-0.8593	0.0508033	-0.0312361	0.124978	0.21181	4
PIN4 _S(ph)LSHSGLDDGLEQGLNR_	-0.694625	-1.31671	-0.309349	-0.114341	0.25882	-0.122483	0.228726	0.590464	5
CYC8 _LNS(ph)PNSNINK_	-0.474653	-0.345922	-0.303187	-0.360101	0.0606744	0.13577	0.115699	0.170747	5
BUD3 _AADVENLS(ph)DDDEHRQNESR_	-0.777591	-1.25829	0.354114	-0.231651	0.24237	-0.0683579	0.124978	0.78927	5
LYS20 _KNDS(ph)DVPELATIPAAK_	0.2242	0.682253	0.656908	1.30258	2.07858	1.63082	2.19283	2.2379	5
CDC34 _IEFEDDDDDDDDS(ph)IDNDS(ph)VMDR_	0.0444641	-0.271949	0.134286	0.162095	0.15611	-0.0916684	0.214498	0.425996	5
MAK21 _AS(ph)NFDSDDEMDENEIWSALVK_	-0.777492	-0.840164	0.00144197	-0.516305	0.639323	-0.101257	0.105276	0.85065	5
BFR2 _DSVDDNENS(ph)DDGLDIPK_	-0.612968	-0.330501	0.267955	-0.333134	0.246773	-0.019609	0.288231	0.436162	5
SUM1 _TAGDDGALDQTENTSIS(ph)PK_	-0.93126	-0.210413	-0.299134	0.205142	1.22719	0.388906	1.15743	1.43691	5
GLY1 _SES(ph)TEVDVDGNAIR_	-1.04674	-1.53935	-0.954515	-0.764199	0.0238682	-0.00172111	1.35744	1.37537	5
NUP145 _AYEPDLS(ph)DADFEGIEASPK_	-0.193618	-0.611755	-0.11573	-0.25484	0.0485152	-0.170662	0.262794	0.197299	5
PRP43 _RFS(ph)SEHPDPVETSIPEQAAEIAEELSK_	-1.56516	-1.58563	-0.559877	-0.891482	0.130427	0.11713	0.480618	0.169566	5
SPT6 _EREEDDRLS(ph)EDDLDLLMENAGVER_	-0.544645	-0.83349	-0.303018	-0.404401	-0.180054	-0.557624	-0.185639	0.111936	5
ENP2 _ALTAAEES(ph)DEER_	-0.516233	-0.370462	0.322505	-0.339674	0.204141	-0.15682	0.378512	0.19232	5
YOR1 _TITVGDAVSET(ph)ELENK_	-1.15463	-1.53212	-1.08019	-0.400092	0.337714	-0.0144745	1.35744	1.24501	5
SSZ1 _EENAEEDDES(ph)EWS(ph)DDEPEVVR_	-0.455139	0.0040339	0.13766	0.105944	0.408114	-0.0282707	0.38228	0.466444	5
NUP2 _ETYDS(ph)NES(ph)DDDVTPSTK_	-0.558336	-0.803418	-0.526057	-0.376152	-0.00620248	-0.238459	0.594961	0.354157	5
YLR345W _PNVLS(ph)DDEELLNGLGSEIMKPSR_	-0.635921	-0.425676	0.100574	0.205518	0.336775	0.186489	1.18998	1.24031	5
SUB1 _LLS(ph)DDEYEDDNNNDSTNNDKDK_	-0.172687	-0.296368	0.230449	0.243913	0.304277	-0.0918327	0.228726	0.391658	5
ESC1 _NLS(ph)DLENYSQR_	-0.820336	-1.17348	-0.704865	-0.378663	-0.0645686	0.0768292	0.0144584	0.232799	5
BDP1 _EIEEDNS(ph)DNDKGVDENETAIVEKPSLVGER_	-0.758599	-1.1117	-0.595816	-0.449178	-0.14317	0.0995896	0.00374614	-0.0221493	5
DCP2 _NPISSTVSSNQQS(ph)PK_	-1.51037	-1.1316	0.278978	0.0726272	1.31861	0.866789	1.50014	1.48749	5
RPC31 _LKELAEDVDDAS(ph)TGDGAAK_	-0.280194	-0.877897	0.360196	0.773574	0.534994	0.110355	1.38808	1.12514	5
SLA2 _T(ph)PTPTPPVVAEPAIS(ph)PRPVSQR_	-1.74502	-2.32648	-0.178665	-1.05445	-0.565941	0.0226511	0.20884	0.105292	5
NOP8 _LIEDS(ph)DNDIDHAK_	-0.586688	-0.323967	0.350384	-0.0846703	0.164915	0.00187429	0.342669	0.437228	5
ALE1 _DISASS(ph)PNLGGILK_	-0.528344	-0.832026	-0.2041	0.219339	0.664255	0.126907	1.27965	1.58535	5
MSB1 _RDS(ph)APDNQGIYHTVISK_	-1.06157	-1.20151	0.0453032	-0.0885615	-0.162862	0.0502847	0.105663	0.376068	5
SNU66 _VNFDSANNMS(ph)DEDGGDFKPLK_	-0.276091	-0.116425	0.0521376	0.0851527	0.380563	0.0933573	0.377846	0.365021	5
SIF2 _ETQEDDTNS(ph)IDS(ph)SDDLDGFVK_	-0.112709	-0.282505	-0.2446	-0.417695	0.665393	0.258579	0.124978	-0.817587	6
PPH22 _S(ph)NDEDTDEELEDFNFKPGSSGIADHK_	0.459801	0.570574	-0.243335	0.0859685	1.88632	0.467697	1.03372	-0.930875	6
VAC8 _DSSDEAS(ph)VSPIADNER_	0.105678	-0.230956	-0.0964681	0.0607392	0.472884	-0.102544	-0.240981	-0.445107	6
HSP12 _GKDNAEGQGES(ph)LADQAR_	-0.136569	-0.152356	-0.55537	-0.110371	2.57145	-0.161395	0.124978	-2.50242	6
RTF1 _RIEVGSVEDDDEEDDYNPYSVGNADYGS(ph)EEEEEANPFPLEGK_	0.00776959	-0.0279397	-0.343714	-0.376058	0.63597	0.164788	-0.329501	-0.245996	6
RSC30 _SDS(ph)PDVPSMDQIR_	0.298658	-0.00727507	-0.656149	-0.653809	0.607886	0.202103	-0.899857	-0.994844	6
TRA1 _AEQGDLDS(ph)PKEPQADELLDEFSK_	0.0459685	-0.256934	-0.159541	-0.613079	0.505094	-0.0227666	-0.505021	-0.520418	6
LCB3 _T(ph)LSNPNDFQEPNYLLDPGNHPSDHFR_	-0.346096	-1.35968	-0.716789	-1.18108	-0.165664	0.293318	-0.828225	-1.02658	6
NAP1 _SSM(ox)QIDNAPT(ph)PHNT(ph)PAS(ph)VLNPSYLK_	-0.342859	-0.42909	-0.201344	-0.50943	0.426533	0.429643	-0.505021	-0.669002	6
SIC1 _S(ph)QESEDEEDIIINPVR_	-0.464092	-0.656202	-0.534078	-0.695793	-0.120098	-0.100461	-0.659267	-1.03573	6
RPN13 _MIGVLNNSS(ph)ESDEEESNDEK_	0.169761	-0.0922314	-0.166665	-0.328507	0.686613	0.260869	-0.911641	-0.398246	6
YMR196W _S(ph)SVATTASTESSEQGPK_	0.343919	1.20082	1.02911	1.22444	2.1639	2.29113	0.124978	0.0575542	6
MRE11 _T(ph)GSPDITQSHVDNESR_	0.366129	0.455327	0.292546	0.318809	0.699418	0.325156	0.124978	0.182961	6
MCK1 _KLEHNQPSISY(ph)ICSR_	0.229957	0.0270125	-0.10826	-0.222683	0.572211	0.103195	-0.899857	-0.220535	6
LEM3 _GAIVSGDNPEEEEDVDAS(ph)EFEEDEVKPVR_	-0.128393	-0.0740158	-0.290392	-0.676641	0.95521	-0.0171035	-0.639861	-1.33316	6
FPK1 _T(ph)NSFVGTEEYIAPEVIR_	0.180148	-0.167701	-0.162638	-0.238094	0.359743	0.156039	0.124978	-0.377519	6
LSP1 _ALLELLDDSPVT(ph)PGEAR_	-0.457253	-0.966833	-0.573832	-1.20237	0.828576	-0.151332	-1.50063	-1.70501	6
IST2 _DANIKPVVNAAVNDNQSKVS(ph)VATEQTK_	1.23481	0.332507	-2.92708	-0.221018	-0.208964	0.341886	0.254886	0.403674	7
AIM3 _DS(ph)SPVPSDLDEK_	0.326077	0.623867	-1.63729	0.00460925	0.104452	0.0252522	0.278058	0.331936	7
RPC53 _SEGS(ph)GSSLVQK_	0.832525	0.144438	-2.90996	-0.831435	-0.415943	0.497398	0.124978	0.21181	7
YDR186C _FPNSQQPDSAGASS(ph)PK_	0.316908	0.178636	-0.850949	0.0211314	0.183536	-0.171695	0.0486547	0.540821	7
YDR186C _NLS(ph)SATLIK_	0.442331	0.688271	-4.0217	0.112367	-0.570047	0.0844045	-1.96089	0.268649	7
ECM32 _KENSTIQSSS(ph)SSNLR_	-0.104713	-0.328	-3.67379	-0.88462	-0.429401	-0.120396	-1.32763	-0.307284	7
MIG1 _S(ph)LTDFQGLNNANPNNNGSLR_	0.779043	1.13992	-3.18666	-0.874666	0.474773	-0.380906	-0.323706	0.00343939	7
HXK2 _KGS(ph)M(ox)ADVPK_	0.10286	-0.104418	-3.95092	0.564915	0.30095	0.0396652	-0.7747	-0.976645	7
VHS2 _SLSSQS(ph)FDNETSPAHPR_	-0.439872	-0.115175	-1.25981	0.307778	0.131417	0.184941	-0.240929	-0.208554	7
RNR2 _AAADALSDLEIKDS(ph)KSNLNK_	0.331539	0.916736	-2.10768	-0.0580674	0.754203	-0.549631	-0.323706	0.00343939	7
UTR1 _KISS(ph)ESSSR_	-0.0447616	-0.920352	-3.52339	0.216362	-0.349114	-0.147042	-0.872155	0.464884	7
FBA1 _DYIM(ox)S(ph)PVGNPEGPEKPNKK_	0.540325	1.38272	-1.03466	0.608242	1.04865	0.432425	0.124978	1.70713	7
EAP1 _S(ph)QQAISNLFQK_	-0.539346	-0.483051	-1.69914	0.264476	-0.228985	-0.618251	-0.403479	-0.19479	7
EAP1 _SATSLPSLDNNNQVPSSNVSVVNNDGNS(ph)TPHQSGSR_	-0.388393	0.424707	-0.944888	-0.252484	-0.201149	-0.289485	0.0113791	0.380987	7
YLR257W _DRS(ph)YTSVAELNR_	0.93017	0.371169	-3.16598	0.166812	-0.362622	0.209828	-0.98396	-0.716896	7
PFK2 _VHS(ph)YTDLAYR_	-0.259703	-0.217524	-3.42111	-0.460131	0.404195	-0.338862	0.204615	0.296663	7
PFK2 _VHSYT(ph)DLAYR_	-0.333571	-0.599069	-3.54984	-0.565631	0.153676	-0.33248	0.619651	0.576298	7
ACC1 _AVS(ph)VSDLSYVANSQSSPLR_	0.259423	0.355129	-1.39614	0.170021	0.2361	0.111118	-0.327177	-0.0564312	7
YOR052C _S(ph)DSGTVLGAIPLNSR_	-0.117188	-0.309569	-3.25898	-1.17749	-0.0531793	-0.871575	-0.0403485	-0.0858488	7
AKL1 _ARQS(ph)LDLER_	0.587365	0.064469	0.632827	0.393965	0.348851	0.624144	0.534211	0.449573	8
IST2 _AVDNDT(ph)AGS(ph)AGKKPLATESTEK_	-0.567212	-0.749475	0.479334	0.987685	0.598151	0.448157	0.966283	0.815985	8
MAK5 _KAADELGIDVDS(ph)DEDDISK_	-0.44603	-0.492566	0.398022	-0.0615862	-0.183035	-0.283182	-0.207394	0.22085	8
FEN1 _NVPTPS(ph)PS(ph)PKPQHR_	-0.199632	-0.163653	0.53554	0.0519776	0.0527637	-0.146595	0.00662118	0.772554	8
LHP1 _RNS(ph)FAVIEFTPEVLDR_	-0.882225	0.063779	1.12029	0.527871	0.0848807	0.509037	0.660381	1.77077	8
RPC53 _GLETIDNGAES(ph)S(ph)ENEAEDDDNEGVASK_	0.0760117	0.14483	0.453017	0.349705	0.101043	0.329308	0.60901	0.302528	8
SAS10 _GMHDNNGADLDDKDYGS(ph)EDEAVSR_	-0.792057	-0.679573	-0.0110354	-0.204433	-0.07927	0.133754	-0.121739	-0.019748	8
SHS1 _FLNS(ph)PDLPER_	-1.29262	-1.16556	0.97508	1.47189	-0.105749	0.13826	0.152094	0.271784	8
MAK21 _ASNFDS(ph)DDEMDENEIWSALVK_	-0.310826	-0.564371	0.152768	-0.159718	-0.083881	0.0501042	0.0916112	0.212318	8
DOP1 _MEAEENPS(ph)ETETNDSHLDR_	0.0733592	-0.354119	0.496002	0.215989	-0.0574683	-0.0559282	0.212009	-0.117991	8
GCD6 _GVGYIYES(ph)EVS(ph)DDEDSSTEACK_	-0.699607	-0.381273	0.0541933	0.127543	-0.149291	-0.0424685	0.342669	0.349931	8
GUK1 _RLS(ph)AAQAELAYAETGAHDK_	-0.0199308	-2.40629	0.603379	0.501651	-0.234584	-1.38613	0.00028851	0.223052	8
CHO1 _DENDGYASDEVGGTLS(ph)R_	0.0256159	-0.071085	0.711583	0.910886	0.790563	0.385923	0.966283	0.716859	8
PDA1 _YGGHS(ph)MSDPGTTYR_	-0.990424	-0.938127	0.744075	1.42838	-0.181176	0.00937434	1.52159	1.44144	8
LEU1 _VEVTS(ph)EDEK_	-2.78091	-2.10067	-0.453546	0.188483	-0.534844	-0.244492	-1.25271	-0.365072	8
NOP7 _SALNADEANTDET(ph)EKEEEQEKK_	-0.147362	-0.171726	0.486148	0.202512	-0.140468	-0.0483638	-0.158494	0.310689	8
SPT6 _GGILDELDDFIEDDEFS(ph)DEDDETR_	-0.361831	-0.557929	0.059909	-0.240367	-0.0655481	0.0151059	-0.30228	-0.0353278	8
TFG1 _AVDSSNNASNTVPS(ph)PIKQEEGLNSTVAER_	-0.689823	-0.047577	0.662114	0.444243	0.22276	0.142722	0.534211	0.367838	8
HXT1 _NES(ph)FHDNLS(ph)ESQVQPAVAPPNTGK_	-1.49789	-2.78836	0.087938	-0.00395118	-0.148264	0.0803724	0.19639	-0.299494	8
HXT1 _NESFHDNLS(ph)ESQVQPAVAPPNTGK_	-1.47277	-3.79744	-0.316905	-1.71909	-0.313877	-0.0704468	-0.408711	-0.621428	8
AIM21 _RS(ph)TTEELNNVMNNTSK_	0.0625417	0.094724	1.57386	1.09038	0.0191047	0.211137	0.766298	1.03471	8
AIM21 _SNNEVTEHS(ph)DSEDLTEK_	0.123931	-0.142656	0.42503	0.254715	0.358507	-0.107936	0.130799	0.312607	8
URA2 _RFS(ph)ITEEAIADNLDAAEDAIPEQPLEQK_	0.22428	0.227542	1.56922	2.26506	0.277843	0.53872	1.2798	0.974382	8
CDC11 _RNT(ph)NPFK_	-0.111259	0.282262	0.721591	0.818442	0.314923	0.0942388	0.966283	0.716859	8
MAK11 _DAETADIGDQSEVESDT(ph)EELKK_	-0.556542	-0.0413429	0.779218	-0.0822398	0.272024	0.107024	0.225716	0.257689	8
VPS13 _S(ph)PSPDPASLSSESER_	-0.474952	-0.965552	0.113834	-0.0780458	-0.210546	0.16877	0.130667	0.398898	8
CBF5 _EYVPLDNAEQSTSSS(ph)QETK_	-0.245232	-1.03233	0.231555	-0.275839	-0.213701	-0.0979902	0.036031	0.515046	8
VTA1 _EIGGES(ph)EAEDSDK_	-0.699701	-1.20287	0.8614	0.297837	-0.187968	0.152919	0.534211	0.264908	8
CRN1 _KSS(ph)DIDQVNNAEDPSR_	-0.256887	-0.0815837	2.06126	2.14313	0.23585	0.394953	1.25211	1.32227	8
YMR031C _NNS(ph)ITSATSK_	-0.328453	-0.638905	0.388245	1.13553	0.201288	0.24663	0.124978	0.815985	8
EFR3 _TATGENQNDDFKDANEDLHS(ph)LSSR_	-0.0402892	-0.534203	0.427606	0.229465	-0.231083	-0.104015	-0.0779118	0.0964762	8
ADE4 _RES(ph)IANNSSDMK_	-0.818071	-0.279739	0.251325	0.734655	0.609823	-0.0881547	0.389432	0.767247	8
NOP12 _KLFGTNPIAETEES(ph)GNEKEEESSK_	-0.310039	-0.183572	0.0272082	0.245286	-0.131807	0.100468	0.0170667	-0.120577	8
MAM3 _AADQADESSPLLS(ph)PSNSNHPSEHPQQDLNNK_	-0.856424	-1.08452	1.05047	0.624616	0.497485	1.27971	0.180476	0.210974	8
CAF20 _KKGSGEDDEEETET(ph)TPTSTVPVATIAQETLK_	-0.231498	-0.677357	0.743127	1.00784	0.649294	0.849079	0.0470637	0.584338	8
PEX25 _FSAGSGSESHTESSRS(ph)DDEDSQAK_	-0.373813	0.184344	1.03668	0.714399	0.165856	0.19024	0.23677	0.565046	8
TIF5 _AAKPFITWLETAES(ph)DDDEEDDE_	-0.191063	-0.13016	0.212694	0.209378	0.439517	-0.053097	0.329617	0.432959	8
