# Supplementary material for: Towards Systematic Discovery of Signaling Networks in Budding Yeast Filamentous Growth Stress Response Using Interventional Phosphorylation Data
Source: PLoS Comput Biol. 2013 Jun 27;9(6):e1003077. doi: 10.1371/journal.pcbi.1003077 (PMC3694812; doi:10.1371/journal.pcbi.1003077)
Supplement: Dataset S4 — Strongly correlated phosphopeptide pairs (from complete measurements, p<0.05 and |correlation| > = 0.9). (XLSX) [file pcbi.1003077.s004.xlsx]

## Sheet: sigpepcor.p0.05abscor0.9.symbol
query	array	correlation	p
SPT6 _VGDEGNAAES(ph)ESDNVAASR_	ABF1 _ADDEEDLS(ph)DENIQPELR_	0.965408	0.000100814
LYS21 _DFHAELS(ph)TPLLKPVNK_	LYS21 _DFHAELST(ph)PLLKPVNK_	0.958992	0.000167149
KEM1 _KGEIKPSSGTNSTECQS(ph)PK_	SPA2 _KPASFLNDVEEEES(ph)PVKPLK_	0.954749	0.000223848
NUP145 _TDGTFGTLSGKDDS(ph)IVEEK_	SPT6 _VGDEGNAAES(ph)ESDNVAASR_	0.953437	0.000243649
SEC21 _SETTLDTT(ph)PEAESVPEKR_	ARE2 _KSS(ph)PDAVDSVGK_	0.953318	0.000245504
KEM1 _KGEIKPSSGTNSTECQS(ph)PK_	UFD1 _APKS(ph)PEVIEID_	0.948709	0.000324501
GPD2 _S(ph)DSAVSIVHLK_	GPD2 _SDS(ph)AVSIVHLK_	0.940039	0.000514992
NUP145 _TDGTFGTLSGKDDS(ph)IVEEK_	ABF1 _ADDEEDLS(ph)DENIQPELR_	0.938272	0.000561122
GLY1 _S(ph)ESTEVDVDGNAIR_	KEM1 _KGEIKPSSGTNSTECQS(ph)PK_	0.93632	0.000615151
PBI2 _HNDVIENVEEDKEVHT(ph)N_	SEC21 _SETTLDTT(ph)PEAESVPEKR_	0.935871	0.000628014
PAF1 _RLDDGDS(ph)DDENLDVNHIISR_	PUF6 _ISIDS(ph)S(ph)DEESELSK_	0.935768	0.000631018
GEA2 _VNNEEAIS(ph)EDDGIEEEHIHSEK_	ESC1 _SVESDLHEHS(ph)PDNLYDLAAR_	0.934039	0.000682441
ABF1 _ADDEEDLS(ph)DENIQPELR_	PWP1 _ATLEEAEGES(ph)GVEDDAATGSSNK_	0.933835	0.00068867
NTH1 _RGS(ph)EDDTYSSSQGNR_	RPS3 _EEEPILAPS(ph)VK_	0.92342	0.00105926
PBP1 _VADSGVSDS(ph)VDDLAK_	NUP2 _ADGTGEAQVDNS(ph)PTTESNSR_	0.923043	0.00107468
CHO1 _DENDGYAS(ph)DEVGGTLSR_	NUP145 _TDGTFGTLSGKDDS(ph)IVEEK_	0.922273	0.00110661
SPT6 _VGDEGNAAES(ph)ESDNVAASR_	PWP1 _ATLEEAEGES(ph)GVEDDAATGSSNK_	0.922273	0.00110661
BUG1 _SENNDQNDVDEES(ph)EEKEIEQVK_	SEC21 _SETTLDTT(ph)PEAESVPEKR_	0.920419	0.00118599
APL3 _RNT(ph)IDDVNSK_	CHO1 _DENDGYAS(ph)DEVGGTLSR_	0.920404	0.00118663
SUM1 _TAGDDGALDQTENTSIS(ph)PK_	DCP2 _NPISSTVSSNQQS(ph)PK_	0.916197	0.00138042
SUM1 _TAGDDGALDQTENTSIS(ph)PK_	SPA2 _KPASFLNDVEEEES(ph)PVKPLK_	0.915846	0.00139745
KEL1 _NNS(ph)PILETLPSNEIK_	SPA2 _KPASFLNDVEEEES(ph)PVKPLK_	0.915654	0.00140683
HSP42 _KS(ph)S(ph)SFAHLQAPSPIPDPLQVSKPETR_	SSD1 _SST(ph)INNDSDSLSSPTK_	0.914778	0.00145016
NUP145 _TDGTFGTLSGKDDS(ph)IVEEK_	PWP1 _ATLEEAEGES(ph)GVEDDAATGSSNK_	0.913607	0.00150941
UFD1 _APKS(ph)PEVIEID_	SPA2 _KPASFLNDVEEEES(ph)PVKPLK_	0.910428	0.00167808
SUM1 _TAGDDGALDQTENTSIS(ph)PK_	KEM1 _KGEIKPSSGTNSTECQS(ph)PK_	0.902907	0.00212486
GLY1 _S(ph)ESTEVDVDGNAIR_	SPA2 _KPASFLNDVEEEES(ph)PVKPLK_	0.902128	0.00217511
HSP42 _KS(ph)S(ph)SFAHLQAPSPIPDPLQVSKPETR_	PUF6 _ISIDS(ph)S(ph)DEESELSK_	-0.901773	0.00219822
HSP42 _KS(ph)S(ph)SFAHLQAPSPIPDPLQVSKPETR_	NUP145 _TDGTFGTLSGKDDS(ph)IVEEK_	-0.903774	0.00206981
PBP1 _VADSGVSDS(ph)VDDLAK_	ABF1 _ADDEEDLS(ph)DENIQPELR_	-0.905281	0.0019764
PWP1 _ATLEEAEGES(ph)GVEDDAATGSSNK_	ARE2 _KSS(ph)PDAVDSVGK_	-0.909809	0.00171231
KEM1 _KGEIKPSSGTNSTECQS(ph)PK_	SEC21 _SETTLDTT(ph)PEAESVPEKR_	-0.911327	0.00162922
GLY1 _S(ph)ESTEVDVDGNAIR_	ARE2 _KSS(ph)PDAVDSVGK_	-0.912091	0.00158841
HSP42 _KS(ph)S(ph)SFAHLQAPSPIPDPLQVSKPETR_	CHO1 _DENDGYAS(ph)DEVGGTLSR_	-0.912392	0.00157248
DCP2 _NPISSTVSSNQQS(ph)PK_	ARE2 _KSS(ph)PDAVDSVGK_	-0.91714	0.00133534
PBI2 _HNDVIENVEEDKEVHT(ph)N_	DCP2 _NPISSTVSSNQQS(ph)PK_	-0.92036	0.00118856
DCP2 _NPISSTVSSNQQS(ph)PK_	SEC21 _SETTLDTT(ph)PEAESVPEKR_	-0.927876	0.000887939
PCT1 _EAS(ph)PATEFANEFTGENSTAK_	PDR12 _HLSNILS(ph)NEEGIER_	-0.928849	0.000853142
GLY1 _S(ph)ESTEVDVDGNAIR_	SEC21 _SETTLDTT(ph)PEAESVPEKR_	-0.935918	0.000626655
SSD1 _SST(ph)INNDSDSLSSPTK_	PUF6 _ISIDS(ph)S(ph)DEESELSK_	-0.941504	0.000478709
ABF1 _ADDEEDLS(ph)DENIQPELR_	NUP2 _ADGTGEAQVDNS(ph)PTTESNSR_	-0.942365	0.00045818
CHO1 _DENDGYAS(ph)DEVGGTLSR_	BDF1 _WADRPNLDDYDS(ph)DEDSR_	-0.944186	0.000416691
YRO2 _KAQEEEEDVATDS(ph)E_	DCP2 _NPISSTVSSNQQS(ph)PK_	-0.945056	0.000397768
SSD1 _SST(ph)INNDSDSLSSPTK_	BUD27 _ILENIS(ph)DDDYDDDDDGNKK_	-0.94602	0.000377472
VBA4 _IDDSPQDEVNS(ph)IK_	ARE2 _KSS(ph)PDAVDSVGK_	-0.960242	0.000152465
