# Supplementary material for: Towards Systematic Discovery of Signaling Networks in Budding Yeast Filamentous Growth Stress Response Using Interventional Phosphorylation Data
Source: PubMed Central journal article supplement (PMC3694812; doi:10.1371/journal.pcbi.1003077), 2013-06-27
Supplement: pcbi.1003077.s005.pdf [file pcbi.1003077.s005.pdf]

# **Towards Systematic Discovery of Signaling Networks in Budding Yeast Filamentous Growth Stress Response Using Interventional Phosphorylation Data**

## **Supplementary file**

This pdf file contains the supplementary Tables S1-S4 and Figures S1-S2.

The supplementary Datasets S1-S4 are provided in separate excel files.

## Supplementary Tables

**Table S1. Proteins involved in filamentous growth obtained from literature and databases.**

|    | Standard.name | ENSEMBL.ID | Detected in our dataset? |
|----|---------------|------------|--------------------------|
| 1  | BCY1          | YIL033C    | YES                      |
| 2  | BMH1          | YER177W    | YES                      |
| 3  | BMH2          | YDR099W    |                          |
| 4  | BUD2          | YKL092C    | YES                      |
| 5  | CAP2          | YIL034C    |                          |
| 6  | CDC28         | YBR160W    | YES                      |
| 7  | CDC42         | YLR229C    |                          |
| 8  | CYR1          | YJL005W    | YES                      |
| 9  | DFG10         | YIL049W    |                          |
| 10 | DFG5          | YMR238W    |                          |
| 11 | DIG1          | YPL049C    | YES                      |
| 12 | DIG2          | YDR480W    | YES                      |
| 13 | DLD3          | YEL071W    |                          |
| 14 | DOT6          | YER088C    |                          |
| 15 | DSE1          | YER124C    |                          |
| 16 | ECM25         | YJL201W    |                          |
| 17 | ELM1          | YKL048C    |                          |
| 18 | EMP70         | YLR083C    |                          |
| 19 | FIG2          | YCR089W    |                          |
| 20 | FLO10         | YKR102W    |                          |
| 21 | FLO8          | YER109C    | YES                      |
| 22 | FUS3          | YBL016W    |                          |
| 23 | GAS1          | YMR307W    |                          |
| 24 | GPA2          | YER020W    |                          |
| 25 | GPR1          | YDL035C    | YES                      |
| 26 | GRE2          | YOL151W    |                          |
| 27 | HKR1          | YDR420W    |                          |
| 28 | HMS1          | YOR032C    |                          |
| 29 | HMS2          | YJR147W    |                          |
| 30 | HSL1          | YKL101W    |                          |
| 31 | ILM1          | YJR118C    |                          |
| 32 | KEM1          | YGL173C    | YES                      |
| 33 | KSP1          | YHR082C    |                          |
| 34 | KSS1          | YGR040W    |                          |
| 35 | MEP2          | YNL142W    |                          |
| 36 | MGA1          | YGR249W    |                          |
| 37 | MSB2          | YGR014W    |                          |

|    |         |           |     |
|----|---------|-----------|-----|
| 38 | MUC1    | YIR019C   |     |
| 39 | NRG1    | YDR043C   | YES |
| 40 | NRG2    | YBR066C   |     |
| 41 | PEA2    | YER149C   | YES |
| 42 | PLC1    | YPL268W   |     |
| 43 | PTP1    | YDL230W   |     |
| 44 | RAS2    | YNL098C   | YES |
| 45 | SEC66   | YBR171W   |     |
| 46 | SEM1    | YDR363W-A |     |
| 47 | SFL1    | YOR140W   | YES |
| 48 | SHO1    | YER118C   |     |
| 49 | SKS1    | YPL026C   |     |
| 50 | SNF1    | YDR477W   | YES |
| 51 | SPA2    | YLL021W   | YES |
| 52 | SPH1    | YLR313C   |     |
| 53 | SSN3    | YPL042C   |     |
| 54 | STE11   | YLR362W   |     |
| 55 | STE12   | YHR084W   |     |
| 56 | STE20   | YHL007C   | YES |
| 57 | STE50   | YCL032W   | YES |
| 58 | STE7    | YDL159W   |     |
| 59 | SWE1    | YJL187C   |     |
| 60 | TEC1    | YBR083W   |     |
| 61 | TMN2    | YDR107C   |     |
| 62 | TMN3    | YER113C   |     |
| 63 | TPK1    | YJL164C   |     |
| 64 | TPK2    | YPL203W   |     |
| 65 | TPK3    | YKL166C   | YES |
| 66 | TPM1    | YNL079C   | YES |
| 67 | VPS60   | YDR486C   |     |
| 68 | YBR062C | YBR062C   |     |
| 69 | YNL260C | YNL260C   |     |

**Table S2. Phosphoproteins having degrees of connectivity greater than 1 in the stringent correlation network.**

| Index | Standard name      | Degree of connectivity | Evidence of involvement in filamentous growth                                                                                                                         | Remarks                                                                                                                                                     | Stress response                                                                                                                                                                 |
|-------|--------------------|------------------------|-----------------------------------------------------------------------------------------------------------------------------------------------------------------------|-------------------------------------------------------------------------------------------------------------------------------------------------------------|---------------------------------------------------------------------------------------------------------------------------------------------------------------------------------|
| 1     | SEC21              | 6                      | -                                                                                                                                                                     | In the stringent correlation network, SEC1 correlated with KEM1 (known involved in filamentous growth), and ARE2 (indirect evidence of involvement).        | <i>SEC21</i> overexpression leads to decreased rapamycin resistance. [1]. Sec21p mutants have reduced resistance to tunicamycin decreased [2].                                  |
| 2     | ABF1               | 5                      | -                                                                                                                                                                     | In the stringent correlation network, ABF1 correlated with SPT6 (known involved in filamentous growth), and PBP1 (validated by our experiment).             | Implicated in oxidative stress [3]. Abf1p mutants exhibit decreased sensitivity to tunicamycin [3].                                                                             |
| 3     | ARE2               | 5                      | Are2p has positive physical interactions with Fus3p, Tpk1p and Ste20p [4].                                                                                            | Several other proteins involved in sterol biosynthesis or response are differentially phosphorylated in the kinase-dead mutants (YML008C, YHR073W, YKL140W) | Are2p is linked to cell wall construction and plays a key role in sterol biosynthesis whose regulation is important in specific stress responses [5,6].                         |
| 4     | DCP2               | 5                      | (1) Dcp2p has physical interactions with Spt6p [7] and Kem1p [7–9], both are involved in filamentous growth. (2) Dcp2p is a phosphorylation substrate of Ste20p [10]. | In the stringent correlation network, DCP2 is highly correlated with SUM1 (positive) and ARE2 (negative).                                                   | Dcp2p is involved in stress granule assembly [10].                                                                                                                              |
| 5     | KEM1 (Alias XRN1 ) | 5                      | Kem1p plays a direct role in yeast filamentous growth, affecting <i>FLO11</i> transcription [11].                                                                     |                                                                                                                                                             | <i>KEM1</i> deletion has increased sensitivity to hyperosmotic stress [12].                                                                                                     |
| 6     | NUP145             | 5                      | -                                                                                                                                                                     | In the stringent correlation network, NUP145 is highly correlated with SPT6 (known involved in filamentous growth) and HSP42(indirect evidence).            | <i>NUP145</i> deletion has decreased resistance to sodium arsenite [13]. Reduced functioning of Nup145p causes the strain to also have decreased resistance to tunicamycin [2]. |
| 7     | SPA2               | 5                      | When <i>SPA2</i> is disrupted, filamentous growth decreases [14]. Refer to SGD.                                                                                       |                                                                                                                                                             | Required for recovery from osmotic stress [15].                                                                                                                                 |
| 8     | CHO1               | 4                      | -                                                                                                                                                                     |                                                                                                                                                             |                                                                                                                                                                                 |
| 9     | GLY1               | 4                      | -                                                                                                                                                                     | In the stringent correlation network, GLY1 has positive correlation with KEM1 and SPA2, both known                                                          | The <i>GLY1</i> deletion strain has decreased resistance to hyperosmotic stress [16].                                                                                           |

|    |       |   |                                                                                                                                                                                                                                                                                                                                                                                                                                                                                                                                                                                                                                                                              |                                                                                |                                                                                                                                                                                 |
|----|-------|---|------------------------------------------------------------------------------------------------------------------------------------------------------------------------------------------------------------------------------------------------------------------------------------------------------------------------------------------------------------------------------------------------------------------------------------------------------------------------------------------------------------------------------------------------------------------------------------------------------------------------------------------------------------------------------|--------------------------------------------------------------------------------|---------------------------------------------------------------------------------------------------------------------------------------------------------------------------------|
|    |       |   |                                                                                                                                                                                                                                                                                                                                                                                                                                                                                                                                                                                                                                                                              | to be involved in filamentous growth.                                          |                                                                                                                                                                                 |
| 10 | HSP42 | 4 | Hsp42p has physical association with Fus3p [17].                                                                                                                                                                                                                                                                                                                                                                                                                                                                                                                                                                                                                             |                                                                                | Protein expression is induced by stresses such as heat shock, salt shock and starvation [18], which might also contribute to the phosphorylation level change that we detected. |
| 11 | PWP1  | 4 | -                                                                                                                                                                                                                                                                                                                                                                                                                                                                                                                                                                                                                                                                            | In the stringent correlation network, PWP1 has positive correlation with SPT6. | Pwp1p mutants have decreased resistance to tunicamycin [2].                                                                                                                     |
| 12 | PUF6  | 3 | -                                                                                                                                                                                                                                                                                                                                                                                                                                                                                                                                                                                                                                                                            |                                                                                | The <i>PUF6</i> deletion strain has decreased resistance to multiple chemical stresses [19–21] and is more sensitive to both cold [22] and heat [23].                           |
| 13 | SPT6  | 3 | (1) Filamentous growth decreases when <i>SPT6</i> is disrupted [14]. Refer to SGD. (2) <i>SPT6</i> has a genetic interaction with <i>RAS2</i> [24] which regulates filamentous growth [25]. (3) Spt6p has physical interaction with Kss1p [4].                                                                                                                                                                                                                                                                                                                                                                                                                               |                                                                                | Spt6p is involved in regulation of transcription from RNA polymerase II promoter in response to stress [26].                                                                    |
| 14 | SSD1  | 3 | (1) Ssd1p has physical interactions with Ste20p [4] and Kem1p [27]. (2) <i>SSD1</i> has positive genetic interaction with <i>KEM1</i> [28], and negative genetic interaction with <i>STE50</i> [29], known to be involved in filamentous growth [30]. (3) <i>SSD1</i> also has negative genetic interaction with <i>ILM1</i> [31]. Ilm1p is required for slowed DNA synthesis-induced filamentous growth [32,33]. (4) Overexpression of the <i>SSD1</i> homologue, <i>ropy</i> , in <i>N. crassa</i> has been shown to suppress mutations of <i>POD6</i> and <i>COT1</i> which play essential roles in hyphal tip extension [34], a process required for filamentous growth. |                                                                                | Required for thermotolerance [35] and migrates to stress granules [36].                                                                                                         |
| 15 | SUM1  | 3 | <i>SUM1</i> has a negative                                                                                                                                                                                                                                                                                                                                                                                                                                                                                                                                                                                                                                                   | In the stringent                                                               | Involved in osmotic                                                                                                                                                             |

|    |      |   |                                                                                                                                                                                                                                                          |                                                                                                                                          |                                                                                                                                                                                    |
|----|------|---|----------------------------------------------------------------------------------------------------------------------------------------------------------------------------------------------------------------------------------------------------------|------------------------------------------------------------------------------------------------------------------------------------------|------------------------------------------------------------------------------------------------------------------------------------------------------------------------------------|
|    |      |   | genetic interaction with <i>ELM1</i> and <i>TPK3</i> [37].                                                                                                                                                                                               | correlation network, SUM1 has positive correlation with SPA2 and KEM1, both known to be involved in filamentous growth.                  | stress [38]. Predicted to be involved in stress response [39].                                                                                                                     |
| 16 | NUP2 | 2 | -                                                                                                                                                                                                                                                        | In the stringent correlation network, NUP2 are positively correlated PBP1(predicted and validated by our experiment).                    | Nup2p is involved in mRNA export from nucleus in response to heat stress [40]. When Nup2 is deleted, the strain has decreased resistance to bortezomib [41] and arsenite(3-) [42]. |
| 17 | PBI2 | 2 | Pbi2p has not been reported related to filamentous growth. However, our experiment has validated that <i>PBI2</i> mutant strain have decreased filamentous growth under 1% butanol treatment, which will induce filamentous growth in WT haploid strain. |                                                                                                                                          | <i>PBI2</i> deletion has decreased resistance to hperosmotic stress [16] and multiple chemicals [19,20,43].                                                                        |
| 18 | PBP1 | 2 |                                                                                                                                                                                                                                                          |                                                                                                                                          | Pbp1p is involved in stress granule assembly [44]. <i>PBP1</i> mutant has decreased resistance to stress.                                                                          |
| 19 | UFD1 | 2 | <i>UFD1</i> has a negative genetic interaction with <i>KEM1</i> [45].                                                                                                                                                                                    | In the stringent correlation network, UPD1 has positive correlation with KEM1 and SPA2, both known to be involved in filamentous growth. | Involved in ER and heat stress responses [46,47].                                                                                                                                  |

**Table S3. Inferred causal relationships.**

| Index | Inferred relationships | Probability | From protein & peptide                        | To protein & peptide                        | Remarks                            |
|-------|------------------------|-------------|-----------------------------------------------|---------------------------------------------|------------------------------------|
| 1     | SNF1 => PBP1           | 0.75949     | SNF1 _SVSDELDTFLSQS(ph)PPTFQQQSK_             | PBP1 _VADSGVSDS(ph)VDDLAK_                  |                                    |
| 2     | SNF1 => PBP1           | 0.75949     | SNF1 _SVSDELDTFLSQSPPTFQQQS(ph)K_             | PBP1 _VADSGVSDS(ph)VDDLAK_                  |                                    |
| 3     | HSP42 => STE20         | 0.70946     | HSP42<br>_KS(ph)S(ph)SFAHLQAPSPIPDPLQVSKPETR_ | STE20 _HQQPVASSTVNS(ph)NK_                  |                                    |
| 4     | HSP42 => STE20         | 0.70946     | HSP42 _KS(ph)SSFAHLQAPSPIPDPLQVSKPETR_        | STE20 _HQQPVASSTVNS(ph)NK_                  |                                    |
| 5     | PBP1 => STE20          | 0.70946     | PBP1 _VADSGVSDS(ph)VDDLAK_                    | STE20 _HQQPVASSTVNS(ph)NK_                  |                                    |
| 6     | SEC21 => STE20         | 0.70946     | SEC21 _SETTLDTT(ph)PEAESVPEKR_                | STE20 _HQQPVASSTVNS(ph)NK_                  |                                    |
| 7     | ARE2 => STE20          | 0.70946     | ARE2 _KSS(ph)PDAVDSVGK_                       | STE20 _HQQPVASSTVNS(ph)NK_                  | Protein physical interaction [4]   |
| 8     | PDR12 => STE20         | 0.70946     | PDR12 _KEMDS(ph)FEINDLDFDLR_                  | STE20 _HQQPVASSTVNS(ph)NK_                  |                                    |
| 9     | STE20 => SSD1          | 0.66372     | STE20 _HQQPVASSTVNS(ph)NK_                    | SSD1 _NQSQQPQQQLS(ph)PFR_                   | Protein physical interaction [4]   |
| 10    | SNF1 => TPM1           | 0.58252     | SNF1 _SVSDELDTFLSQS(ph)PPTFQQQSK_             | TPM1 _KELDEIAAS(ph)LENL_                    |                                    |
| 11    | SNF1 => RCN2           | 0.58252     | SNF1 _SVSDELDTFLSQS(ph)PPTFQQQSK_             | RCN2 _SSQTS(ph)LPSQLENK_                    |                                    |
| 12    | SNF1 => RCN2           | 0.58252     | SNF1 _SVSDELDTFLSQS(ph)PPTFQQQSK_             | RCN2 _SSQTSLPS(ph)QLENKDK_                  |                                    |
| 13    | SNF1 => TPM1           | 0.58252     | SNF1 _SVSDELDTFLSQSPPTFQQQS(ph)K_             | TPM1 _KELDEIAAS(ph)LENL_                    |                                    |
| 14    | SNF1 => RCN2           | 0.58252     | SNF1 _SVSDELDTFLSQSPPTFQQQS(ph)K_             | RCN2 _SSQTS(ph)LPSQLENK_                    |                                    |
| 15    | SNF1 => RCN2           | 0.58252     | SNF1 _SVSDELDTFLSQSPPTFQQQS(ph)K_             | RCN2 _SSQTSLPS(ph)QLENKDK_                  |                                    |
| 16    | STE20 => PDR12         | 0.58252     | STE20 _RAT(ph)PVS(ph)TPVISKPSMTTTPR_          | PDR12 _HLSNILS(ph)NEEGIER_                  |                                    |
| 17    | STE20 => NUP145        | 0.58252     | STE20 _RAT(ph)PVS(ph)TPVISKPSMTTTPR_          | NUP145<br>_AYEPDLSADDFEGIEAS(ph)PK_         |                                    |
| 18    | STE20 => PBP1          | 0.58252     | STE20 _RAT(ph)PVS(ph)TPVISKPSMTTTPR_          | PBP1 _S(ph)GSNISQGSSTGHTTR_                 |                                    |
| 19    | STE50 => SNF1          | 0.54404     | STE50 _RES(ph)PVTVFR_                         | SNF1<br>_SVSDELDTFLSQS(ph)PPTFQQQSK<br>_    | Negative genetics interaction [48] |
| 20    | STE50 => SNF1          | 0.54404     | STE50 _RES(ph)PVTVFR_                         | SNF1<br>_SVSDELDTFLSQSPPTFQQQS(ph)K<br>_    |                                    |
| 21    | HSP42 => STE20         | 0.54404     | HSP42<br>_KS(ph)S(ph)SFAHLQAPSPIPDPLQVSKPETR_ | STE20<br>_RAT(ph)PVS(ph)TPVISKPSMTTTPR<br>_ |                                    |
| 22    | SSD1 => SNF1           | 0.54404     | SSD1 _SST(ph)INNDSDSLSSPTK_                   | SNF1<br>_SVSDELDTFLSQS(ph)PPTFQQQSK         | Protein physical interaction [4]   |

|    |                    |         |                                     |                                        |                                      |
|----|--------------------|---------|-------------------------------------|----------------------------------------|--------------------------------------|
|    |                    |         |                                     | –                                      |                                      |
| 23 | SSD1 => SNF1       | 0.54404 | SSD1 _SST(ph)INNDSDSLSSPTK_         | SNF1<br>_SVSDELDTFLSQSPPTFQQQS(ph)K    |                                      |
| 24 | SUM1 => SNF1       | 0.54404 | SUM1 _TAGDDGALDQTENTISIS(ph)PK_     | SNF1<br>_SVSDELDTFLSQS(ph)PPTFQQQSK    |                                      |
| 25 | SUM1 => SNF1       | 0.54404 | SUM1 _TAGDDGALDQTENTISIS(ph)PK_     | SNF1<br>_SVSDELDTFLSQSPPTFQQQS(ph)K    |                                      |
| 26 | SUM1 => STE20      | 0.54404 | SUM1 _TAGDDGALDQTENTISIS(ph)PK_     | STE20<br>_RAT(ph)PVS(ph)TPVISKPSMTTTPR |                                      |
| 27 | CHO1 => STE20      | 0.54404 | CHO1 _DENDGYAS(ph)DEVGGLSR_         | STE20<br>_RAT(ph)PVS(ph)TPVISKPSMTTTPR |                                      |
| 28 | NUP145 =><br>STE20 | 0.54404 | NUP145 _TDGTFGLSGKDDS(ph)IVEEK_     | STE20<br>_RAT(ph)PVS(ph)TPVISKPSMTTTPR |                                      |
| 29 | PBP1 => STE20      | 0.54404 | PBP1 _VADSGVSDS(ph)VDDLAK_          | STE20<br>_RAT(ph)PVS(ph)TPVISKPSMTTTPR |                                      |
| 30 | CHO1 => SNF1       | 0.54404 | CHO1 _DENDGYAS(ph)DEVGGLSR_         | SNF1<br>_SVSDELDTFLSQS(ph)PPTFQQQSK    |                                      |
| 31 | NUP145 => SNF1     | 0.54404 | NUP145 _TDGTFGLSGKDDS(ph)IVEEK_     | SNF1<br>_SVSDELDTFLSQS(ph)PPTFQQQSK    |                                      |
| 32 | PWP1 => SNF1       | 0.54404 | PWP1 _ATLEEAEAGES(ph)GVEDDAATGSSNK_ | SNF1<br>_SVSDELDTFLSQS(ph)PPTFQQQSK    |                                      |
| 33 | RAS2 => SNF1       | 0.54404 | RAS2 _NVNSS(ph)TTVVNAR_             | SNF1<br>_SVSDELDTFLSQS(ph)PPTFQQQSK    | Negative genetic<br>interaction [48] |
| 34 | DCP2 => SNF1       | 0.54404 | DCP2 _NPISSTVSSNQQS(ph)PK_          | SNF1<br>_SVSDELDTFLSQS(ph)PPTFQQQSK    |                                      |
| 35 | RCN2 => SNF1       | 0.54404 | RCN2 _NKPLLSINT(ph)DPGVTGVDSSSLNK_  | SNF1<br>_SVSDELDTFLSQS(ph)PPTFQQQSK    |                                      |
| 36 | CHO1 => SNF1       | 0.54404 | CHO1 _DENDGYAS(ph)DEVGGLSR_         | SNF1<br>_SVSDELDTFLSQSPPTFQQQS(ph)K    |                                      |



|    |                |         |                                    |                                        |                                                                                                                                                          |
|----|----------------|---------|------------------------------------|----------------------------------------|----------------------------------------------------------------------------------------------------------------------------------------------------------|
|    |                |         |                                    | –                                      |                                                                                                                                                          |
| 37 | NUP145 => SNF1 | 0.54404 | NUP145 _TDGTFGTLGKDDDS(ph)IVEEK_   | SNF1<br>_SVSDELDTFLSQSPPTFQQQS(ph)K    |                                                                                                                                                          |
| 38 | PWP1 => SNF1   | 0.54404 | PWP1 _ATLEEAEGES(ph)GVEDDAATGSSNK_ | SNF1<br>_SVSDELDTFLSQSPPTFQQQS(ph)K    |                                                                                                                                                          |
| 39 | RAS2 => SNF1   | 0.54404 | RAS2 _NVNSS(ph)TTVVNAR_            | SNF1<br>_SVSDELDTFLSQSPPTFQQQS(ph)K    | Negative genetic interaction [48]                                                                                                                        |
| 40 | DCP2 => SNF1   | 0.54404 | DCP2 _NPISSTVSSNQQS(ph)PK_         | SNF1<br>_SVSDELDTFLSQSPPTFQQQS(ph)K    |                                                                                                                                                          |
| 41 | RCN2 => SNF1   | 0.54404 | RCN2 _NKPLLSINT(ph)DPGVTGVDSSSLNK_ | SNF1<br>_SVSDELDTFLSQSPPTFQQQS(ph)K    | Negative genetic interaction [48]                                                                                                                        |
| 42 | PWP1 => STE20  | 0.54404 | PWP1 _ATLEEAEGES(ph)GVEDDAATGSSNK_ | STE20<br>_RAT(ph)PVS(ph)TPVISKPSMTTTPR |                                                                                                                                                          |
| 43 | RCN2 => STE20  | 0.54404 | RCN2 _NKPLLSINT(ph)DPGVTGVDSSSLNK_ | STE20<br>_RAT(ph)PVS(ph)TPVISKPSMTTTPR | Rcn2p and Bmh1p have physical interaction captured by affinity capture-MS [17], while Bmh1p associates with Ste20p to influence filamentous growth [49]. |
| 44 | PBP1 => STE20  | 0.51655 | PBP1 _S(ph)GSNISQQQSSTGHTR_        | STE20 _LSLTDS(ph)TETIENNATVK_          |                                                                                                                                                          |

**Table S4. Dataset constitution.**

|                         | <b>Samples</b>                                                 |
|-------------------------|----------------------------------------------------------------|
| <b>Three replicates</b> | WT/SNF1-KD and WT/TPK2-KD                                      |
| <b>Two replicates</b>   | WT/ELM1-KD, WT/FUS3-KD, WT/SKS1-KD, WT/STE20-KD and WT/KSP1-KD |
| <b>No replicates</b>    | WT/KSS1-KD                                                     |

Mutants and WTs were mixed for triplex SILAC experiments.

## Supplementary Figures

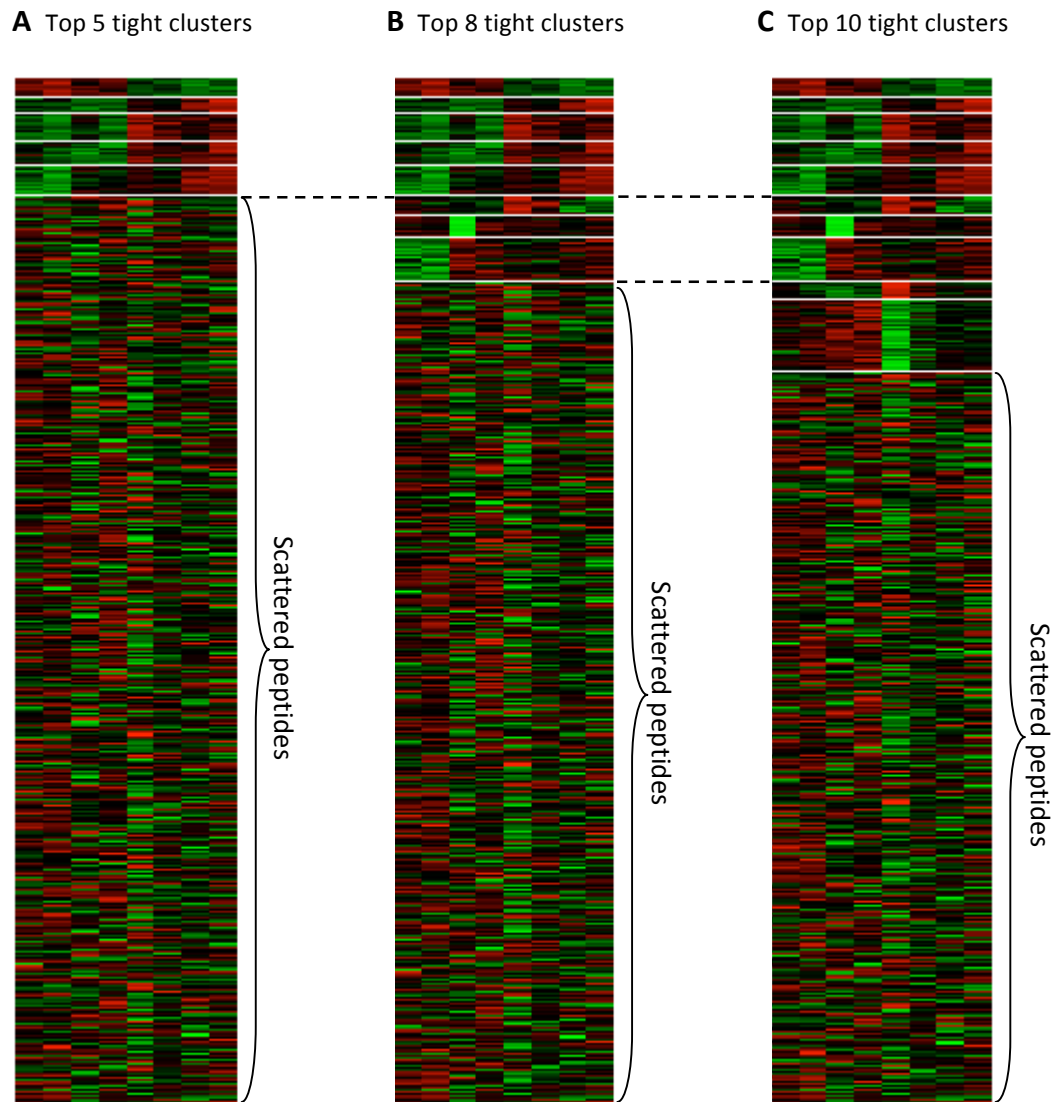

### Figure S1. Top clusters selected by tight clustering.

The phosphopeptides commonly identified in 4 – 8 KD-versus-WT conditions were used. After missing value being imputed, the tight cluster method [50] was used to pick out the top tightest and stablest clusters. R package tightClust was used, adopting the suggested parameters. R code:

```
tight.clust(data.impute, target, k.min=15, random.seed=12345),
```

the value of target is 5, 8 and 10, respectively, for **A**, **B** and **C**. The columns of a map correspond to SKS1-KD, STE20-KD, SNF1-KD, TPK2-KD, ELM1-KD, FUS3-KD, KSS1-KD and KSP1-KD. The rows correspond to phosphopeptides.

**A** - Top 5 tight clusters were sequentially selected, and plotted on the top. The order of stability decreases from the top down. Scattered peptides were not clustered. **B** - Top 8 tight clusters sequentially selected. **C** - Top 10 tight clusters sequentially selected.

**A** Confidence view

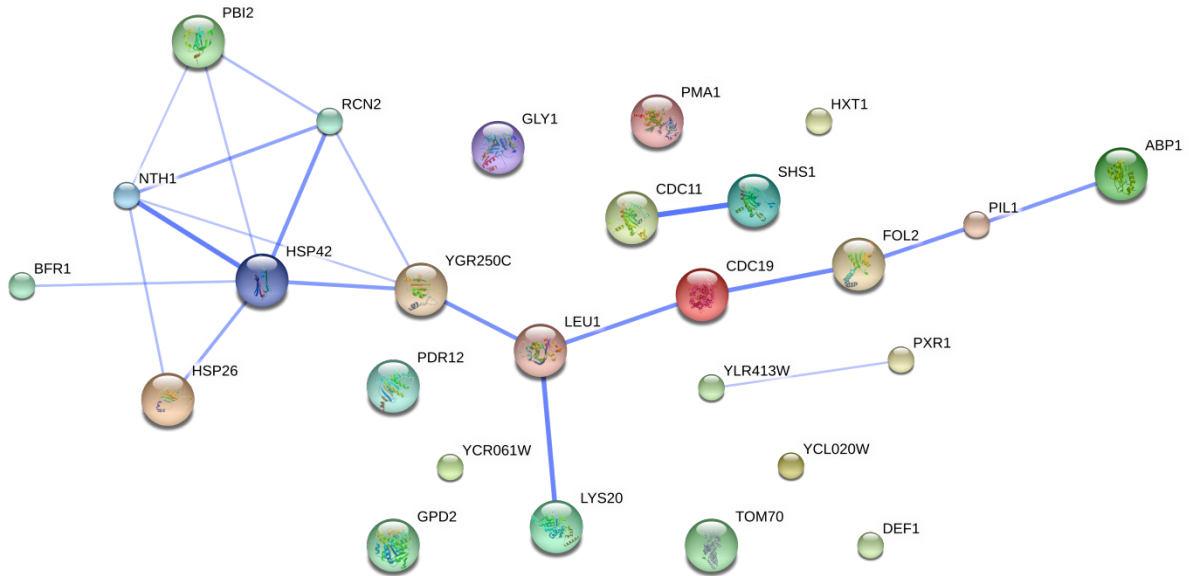

**B** Evidence view

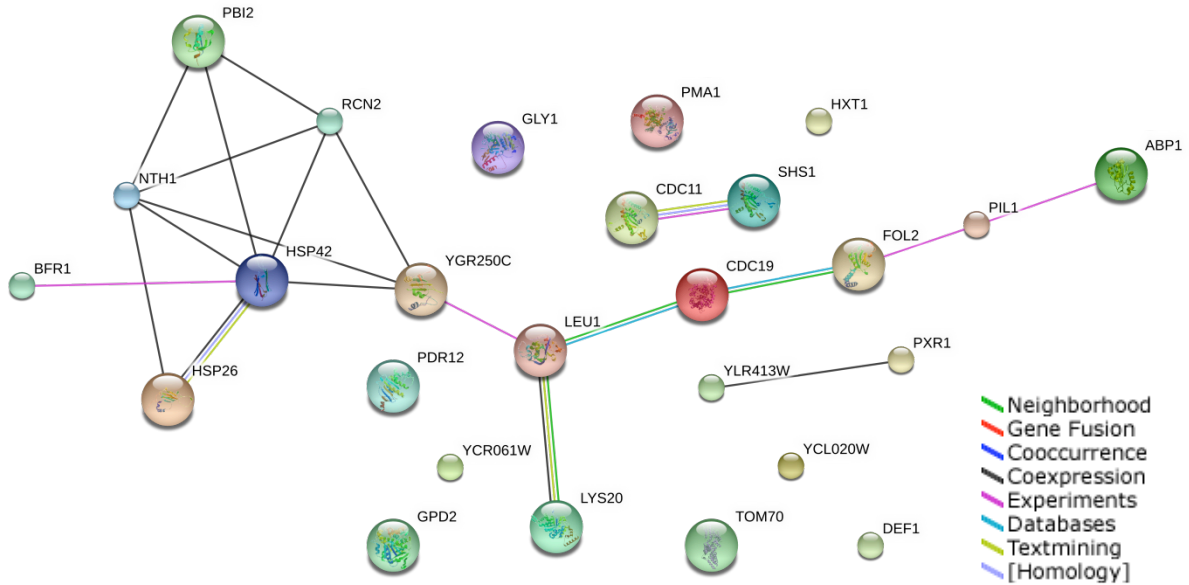

**Figure S2. STRING reported inner connections of the globally significant proteins.**

The network was generated using STRING v9.0 [51,52] using the default parameters with median confidence. **A** – Confidence view. The thicker the edge it, the more confidence the interaction is. **B** – Evidence view. Different colors of the edges indicate different evidence types.

## References

1. Butcher RA, Bhullar BS, Perlstein EO, Marsischky G, LaBaer J, et al. (2006) Microarray-based method for monitoring yeast overexpression strains reveals small-molecule targets in TOR pathway. *Nature chemical biology* 2: 103–109. doi:10.1038/nchembio762.
2. Breslow DK, Cameron DM, Collins SR, Schuldiner M, Stewart-Ornstein J, et al. (2008) A comprehensive strategy enabling high-resolution functional analysis of the yeast genome. *Nature methods* 5: 711–718. doi:10.1038/nmeth.1234.
3. Woo DK, Phang TL, Trawick JD, Poyton RO (2009) Multiple pathways of mitochondrial-nuclear communication in yeast: intergenomic signaling involves ABF1 and affects a different set of genes than retrograde regulation. *Biochimica et Biophysica Acta* 1789: 135–145.
4. Ptacek J, Devgan G, Michaud G, Zhu H, Zhu X, et al. (2005) Global analysis of protein phosphorylation in yeast. *Nature* 438: 679–684. doi:10.1038/nature04187.
5. Borah S, Shivarathri R, Kaur R (2011) The Rho1 GTPase-activating protein CgBem2 is required for survival of azole stress in *Candida glabrata*. *The Journal of biological chemistry* 286: 34311–34324. doi:10.1074/jbc.M111.264671.
6. Montañés FM, Pascual-Ahuir A, Proft M (2011) Repression of ergosterol biosynthesis is essential for stress resistance and is mediated by the Hog1 MAP kinase and the Mot3 and Rox1 transcription factors. *Molecular Microbiology* 79: 1008–1023. doi:10.1111/j.1365-2958.2010.07502.x.
7. Fromont-Racine M, Mayes AE, Brunet-Simon A, Rain JC, Colley A, et al. (2000) Genome-wide protein interaction screens reveal functional networks involving Sm-like proteins. *Yeast (Chichester, England)* 17: 95–110. doi:10.1002/1097-0061(20000630)17:2<95::AID-YEA16>3.0.CO;2-H.
8. Gavin A-C, Aloy P, Grandi P, Krause R, Boesche M, et al. (2006) Proteome survey reveals modularity of the yeast cell machinery. *Nature* 440: 631–636. doi:10.1038/nature04532.
9. Collins SR, Kemmeren P, Zhao X-C, Greenblatt JF, Spencer F, et al. (2007) Toward a comprehensive atlas of the physical interactome of *Saccharomyces cerevisiae*. *Molecular & cellular proteomics : MCP* 6: 439–450. doi:10.1074/mcp.M600381-MCP200.
10. Yoon J-H, Choi E-J, Parker R (2010) Dcp2 phosphorylation by Ste20 modulates stress granule assembly and mRNA decay in *Saccharomyces cerevisiae*. *The Journal of cell biology* 189: 813–827. doi:10.1083/jcb.200912019.
11. Kim J, Kim J (2002) KEM1 is involved in filamentous growth of *Saccharomyces cerevisiae*. *FEMS microbiology letters* 216: 33–38.
12. Cai H, Kauffman S, Naider F, Becker JM (2006) Genomewide screen reveals a wide regulatory network for di/tripeptide utilization in *Saccharomyces cerevisiae*. *Genetics* 172: 1459–1476. doi:10.1534/genetics.105.053041.

13. Pan X, Reissman S, Douglas NR, Huang Z, Yuan DS, et al. (2010) Trivalent arsenic inhibits the functions of chaperonin complex. *Genetics* 186: 725–734. doi:10.1534/genetics.110.117655.
14. Jin R, Dobry CJ, McCown PJ, Kumar A (2008) Large-scale analysis of yeast filamentous growth by systematic gene disruption and overexpression. *Molecular biology of the cell* 19: 284–296. doi:10.1091/mbc.E07-05-0519.
15. Yuzyuk T, Amberg DC (2003) Actin Recovery and Bud Emergence in Osmotically Stressed Cells Requires the Conserved Actin Interacting Mitogen-activated Protein Kinase Kinase Kinase Ssk2p/MTK1 and the Scaffold Protein Spa2p. *Molecular Biology of the Cell* 14: 3013–3026.
16. Yoshikawa K, Tanaka T, Furusawa C, Nagahisa K, Hirasawa T, et al. (2009) Comprehensive phenotypic analysis for identification of genes affecting growth under ethanol stress in *Saccharomyces cerevisiae*. *FEMS yeast research* 9: 32–44. doi:10.1111/j.1567-1364.2008.00456.x.
17. Krogan NJ, Cagney G, Yu H, Zhong G, Guo X, et al. (2006) Global landscape of protein complexes in the yeast *Saccharomyces cerevisiae*. *Nature* 440: 637–643. doi:10.1038/nature04670.
18. Wotton D, Freeman K, Shore D (1996) Multimerization of Hsp42p, a novel heat shock protein of *Saccharomyces cerevisiae*, is dependent on a conserved carboxyl-terminal sequence. *The Journal of biological chemistry* 271: 2717–2723.
19. Cherry JM, Hong EL, Amundsen C, Balakrishnan R, Binkley G, et al. (2011) *Saccharomyces Genome Database: the genomics resource of budding yeast*. *Nucleic acids research*. doi:10.1093/nar/gkr1029.
20. Parsons AB, Brost RL, Ding H, Li Z, Zhang C, et al. (2004) Integration of chemical-genetic and genetic interaction data links bioactive compounds to cellular target pathways. *Nature biotechnology* 22: 62–69. doi:10.1038/nbt919.
21. Kapitzky L, Beltrao P, Berens TJ, Gassner N, Zhou C, et al. (2010) Cross-species chemogenomic profiling reveals evolutionarily conserved drug mode of action. *Molecular systems biology* 6: 451.
22. Li Z, Lee I, Moradi E, Hung N-J, Johnson AW, et al. (2009) Rational extension of the ribosome biogenesis pathway using network-guided genetics. *PLoS biology* 7: e1000213.
23. Sinha H, David L, Pascon RC, Clauder-Münster S, Krishnakumar S, et al. (2008) Sequential elimination of major-effect contributors identifies additional quantitative trait loci conditioning high-temperature growth in yeast. *Genetics* 180: 1661–1670.
24. Howard SC, Hester A, Herman PK (2003) The Ras/PKA signaling pathway may control RNA polymerase II elongation via the Spt4p/Spt5p complex in *Saccharomyces cerevisiae*. *Genetics* 165: 1059–1070.
25. Gimeno CJ, Ljungdahl PO, Styles CA, Fink GR (1992) Unipolar cell divisions in the yeast *S. cerevisiae* lead to filamentous growth: regulation by starvation and RAS. *Cell* 68: 1077–1090.
26. Klopf E, Paskova L, Solé C, Mas G, Petryshyn A, et al. (2009) Cooperation between the INO80 complex and histone chaperones determines adaptation of stress gene transcription in the yeast

- Saccharomyces cerevisiae*. *Molecular and cellular biology* 29: 4994–5007.  
doi:10.1128/MCB.01858-08.
27. Kurischko C, Kim HK, Kuravi VK, Pratzka J, Luca FC (2011) The yeast Cbk1 kinase regulates mRNA localization via the mRNA-binding protein Ssd1. *The Journal of cell biology* 192: 583–598. doi:10.1083/jcb.201011061.
  28. Koh JLY, Ding H, Costanzo M, Baryshnikova A, Toufighi K, et al. (2010) DRYGIN: a database of quantitative genetic interaction networks in yeast. *Nucleic acids research* 38: D502–7. doi:10.1093/nar/gkp820.
  29. Fiedler D, Braberg H, Mehta M, Chechik G, Cagney G, et al. (2009) Functional organization of the *S. cerevisiae* phosphorylation network. *Cell* 136: 952–963. doi:10.1016/j.cell.2008.12.039.
  30. Ramezani Rad M, Jansen G, Bühring F, Hollenberg CP (1998) Ste50p is involved in regulating filamentous growth in the yeast *Saccharomyces cerevisiae* and associates with Ste11p. *Molecular & general genetics* : MGG 259: 29–38.
  31. Hoppins S, Collins SR, Cassidy-Stone A, Hummel E, DeVay RM, et al. (2011) A mitochondrial-focused genetic interaction map reveals a scaffold-like complex required for inner membrane organization in mitochondria. *The Journal of Cell Biology* 195: 323–340. doi:10.1083/jcb.201107053.
  32. Entian KD, Schuster T, Hegemann JH, Becher D, Feldmann H, et al. (1999) Functional analysis of 150 deletion mutants in *Saccharomyces cerevisiae* by a systematic approach. *Molecular & general genetics* : MGG 262: 683–702.
  33. Kang CM, Jiang YW (2005) Genome-wide survey of non-essential genes required for slowed DNA synthesis-induced filamentous growth in yeast. *Yeast (Chichester, England)* 22: 79–90. doi:10.1002/yea.1195.
  34. Seiler S, Vogt N, Ziv C, Gorovits R, Yarden O (2006) The STE20/germinal center kinase POD6 interacts with the NDR kinase COT1 and is involved in polar tip extension in *Neurospora crassa*. *Molecular Biology of the Cell* 17: 4080–4092.
  35. Mir SS, Fiedler D, Cashikar AG (2009) Ssd1 Is Required for Thermotolerance and Hsp104-Mediated Protein Disaggregation in *Saccharomyces cerevisiae*. *Molecular and Cellular Biology* 29: 187–200.
  36. Kurischko C, Kuravi VK, Herbert CJ, Luca FC (2011) Nucleocytoplasmic shuttling of Ssd1 defines the destiny of its bound mRNAs. *Molecular Microbiology* 81: 831–849. doi:10.1111/j.1365-2958.2011.07731.x.
  37. Bandyopadhyay S, Mehta M, Kuo D, Sung M-K, Chuang R, et al. (2010) Rewiring of genetic networks in response to DNA damage. *Science (New York, NY)* 330: 1385–1389. doi:10.1126/science.1195618.
  38. Humphrey T, Enoch T (1998) Sum1, a highly conserved WD-repeat protein, suppresses S-M checkpoint mutants and inhibits the osmotic stress cell cycle response in fission yeast. *Genetics* 148: 1731–1742.

39. Segal E, Shapira M, Regev A, Pe'er D, Botstein D, et al. (2003) Module networks: identifying regulatory modules and their condition-specific regulators from gene expression data. *Nature genetics* 34: 166–176. doi:10.1038/ng1165.
40. Thomsen R, Saguez C, Nasser T, Jensen TH (2008) General, rapid, and transcription-dependent fragmentation of nucleolar antigens in *S. cerevisiae* mRNA export mutants. *RNA (New York, NY)* 14: 706–716. doi:10.1261/rna.718708.
41. Fleming JA, Lightcap ES, Sadis S, Thoroddsen V, Bulawa CE, et al. (2002) Complementary whole-genome technologies reveal the cellular response to proteasome inhibition by PS-341. *Proceedings of the National Academy of Sciences of the United States of America* 99: 1461–1466. doi:10.1073/pnas.032516399.
42. Zhou X, Arita A, Ellen TP, Liu X, Bai J, et al. (2009) A genome-wide screen in *Saccharomyces cerevisiae* reveals pathways affected by arsenic toxicity. *Genomics* 94: 294–307. doi:10.1016/j.ygeno.2009.07.003.
43. Shin C-S, Kim SY, Huh W-K (2009) TORC1 controls degradation of the transcription factor Stp1, a key effector of the SPS amino-acid-sensing pathway in *Saccharomyces cerevisiae*. *Journal of cell science* 122: 2089–2099.
44. Buchan JR, Muhlrud D, Parker R (2008) P bodies promote stress granule assembly in *Saccharomyces cerevisiae*. *The Journal of cell biology* 183: 441–455.
45. Costanzo M, Baryshnikova A, Bellay J, Kim Y, Spear ED, et al. (2010) The genetic landscape of a cell. *Science (New York, NY)* 327: 425–431. doi:10.1126/science.1180823.
46. Chen M, Gutierrez GJ, Ronai ZA (2011) Ubiquitin-recognition protein Ufd1 couples the endoplasmic reticulum (ER) stress response to cell cycle control. *Proceedings of the National Academy of Sciences of the United States of America* 108: 9119–9124. doi:10.1073/pnas.1100028108.
47. Hsieh M-T, Chen R-H (2011) Cdc48 and Cofactors Npl4-Ufd1 Are Important for G1 Progression during Heat Stress by Maintaining Cell Wall Integrity in *Saccharomyces cerevisiae*. *PLoS ONE* 6: 13.
48. Sharifpoor S, Van Dyk D, Costanzo M, Baryshnikova A, Friesen H, et al. (2012) Functional wiring of the yeast kinome revealed by global analysis of genetic network motifs. *Genome research* 22: 791–801.
49. Roberts RL, Mösch HU, Fink GR (1997) 14-3-3 proteins are essential for RAS/MAPK cascade signaling during pseudohyphal development in *S. cerevisiae*. *Cell* 89: 1055–1065.
50. Tseng GC, Wong WH (2005) Tight clustering: a resampling-based approach for identifying stable and tight patterns in data. *Biometrics* 61: 10–16.
51. Von Mering C, Huynen M, Jaeggi D, Schmidt S, Bork P, et al. (2003) STRING: a database of predicted functional associations between proteins. *Nucleic Acids Research* 31: 258–261.

52. Szklarczyk D, Franceschini A, Kuhn M, Simonovic M, Roth A, et al. (2011) The STRING database in 2011: functional interaction networks of proteins, globally integrated and scored. *Nucleic Acids Research* 39: D561–8. doi:10.1093/nar/gkq973.
